# Supplementary material for: Comparison of Drying Techniques for Extraction of Bioactive Compounds from Olive-Tree Materials
Source: Preprints.org preprint supplement (doi:10.20944/preprints202306.0896.v1), 2023-06-13
Supplement: Supplementary file 1 [file supplementary]

Archive with 9 entries (9 files):
- Figure S1.tif
- Figure S2.tif
- Figure S3.tif
- Figure S4.tif
- Figure S5.tif
- Figure S6.tif
- Figure S7.tif
- Figure S8.tif
- Supplementary material.pdf
