# Supplementary figures and images for: Comparison of Drying Techniques for Extraction of Bioactive Compounds from Olive-Tree Materials
Source: Preprints.org preprint supplement (doi:10.20944/preprints202306.0896.v1), 2023-06-13

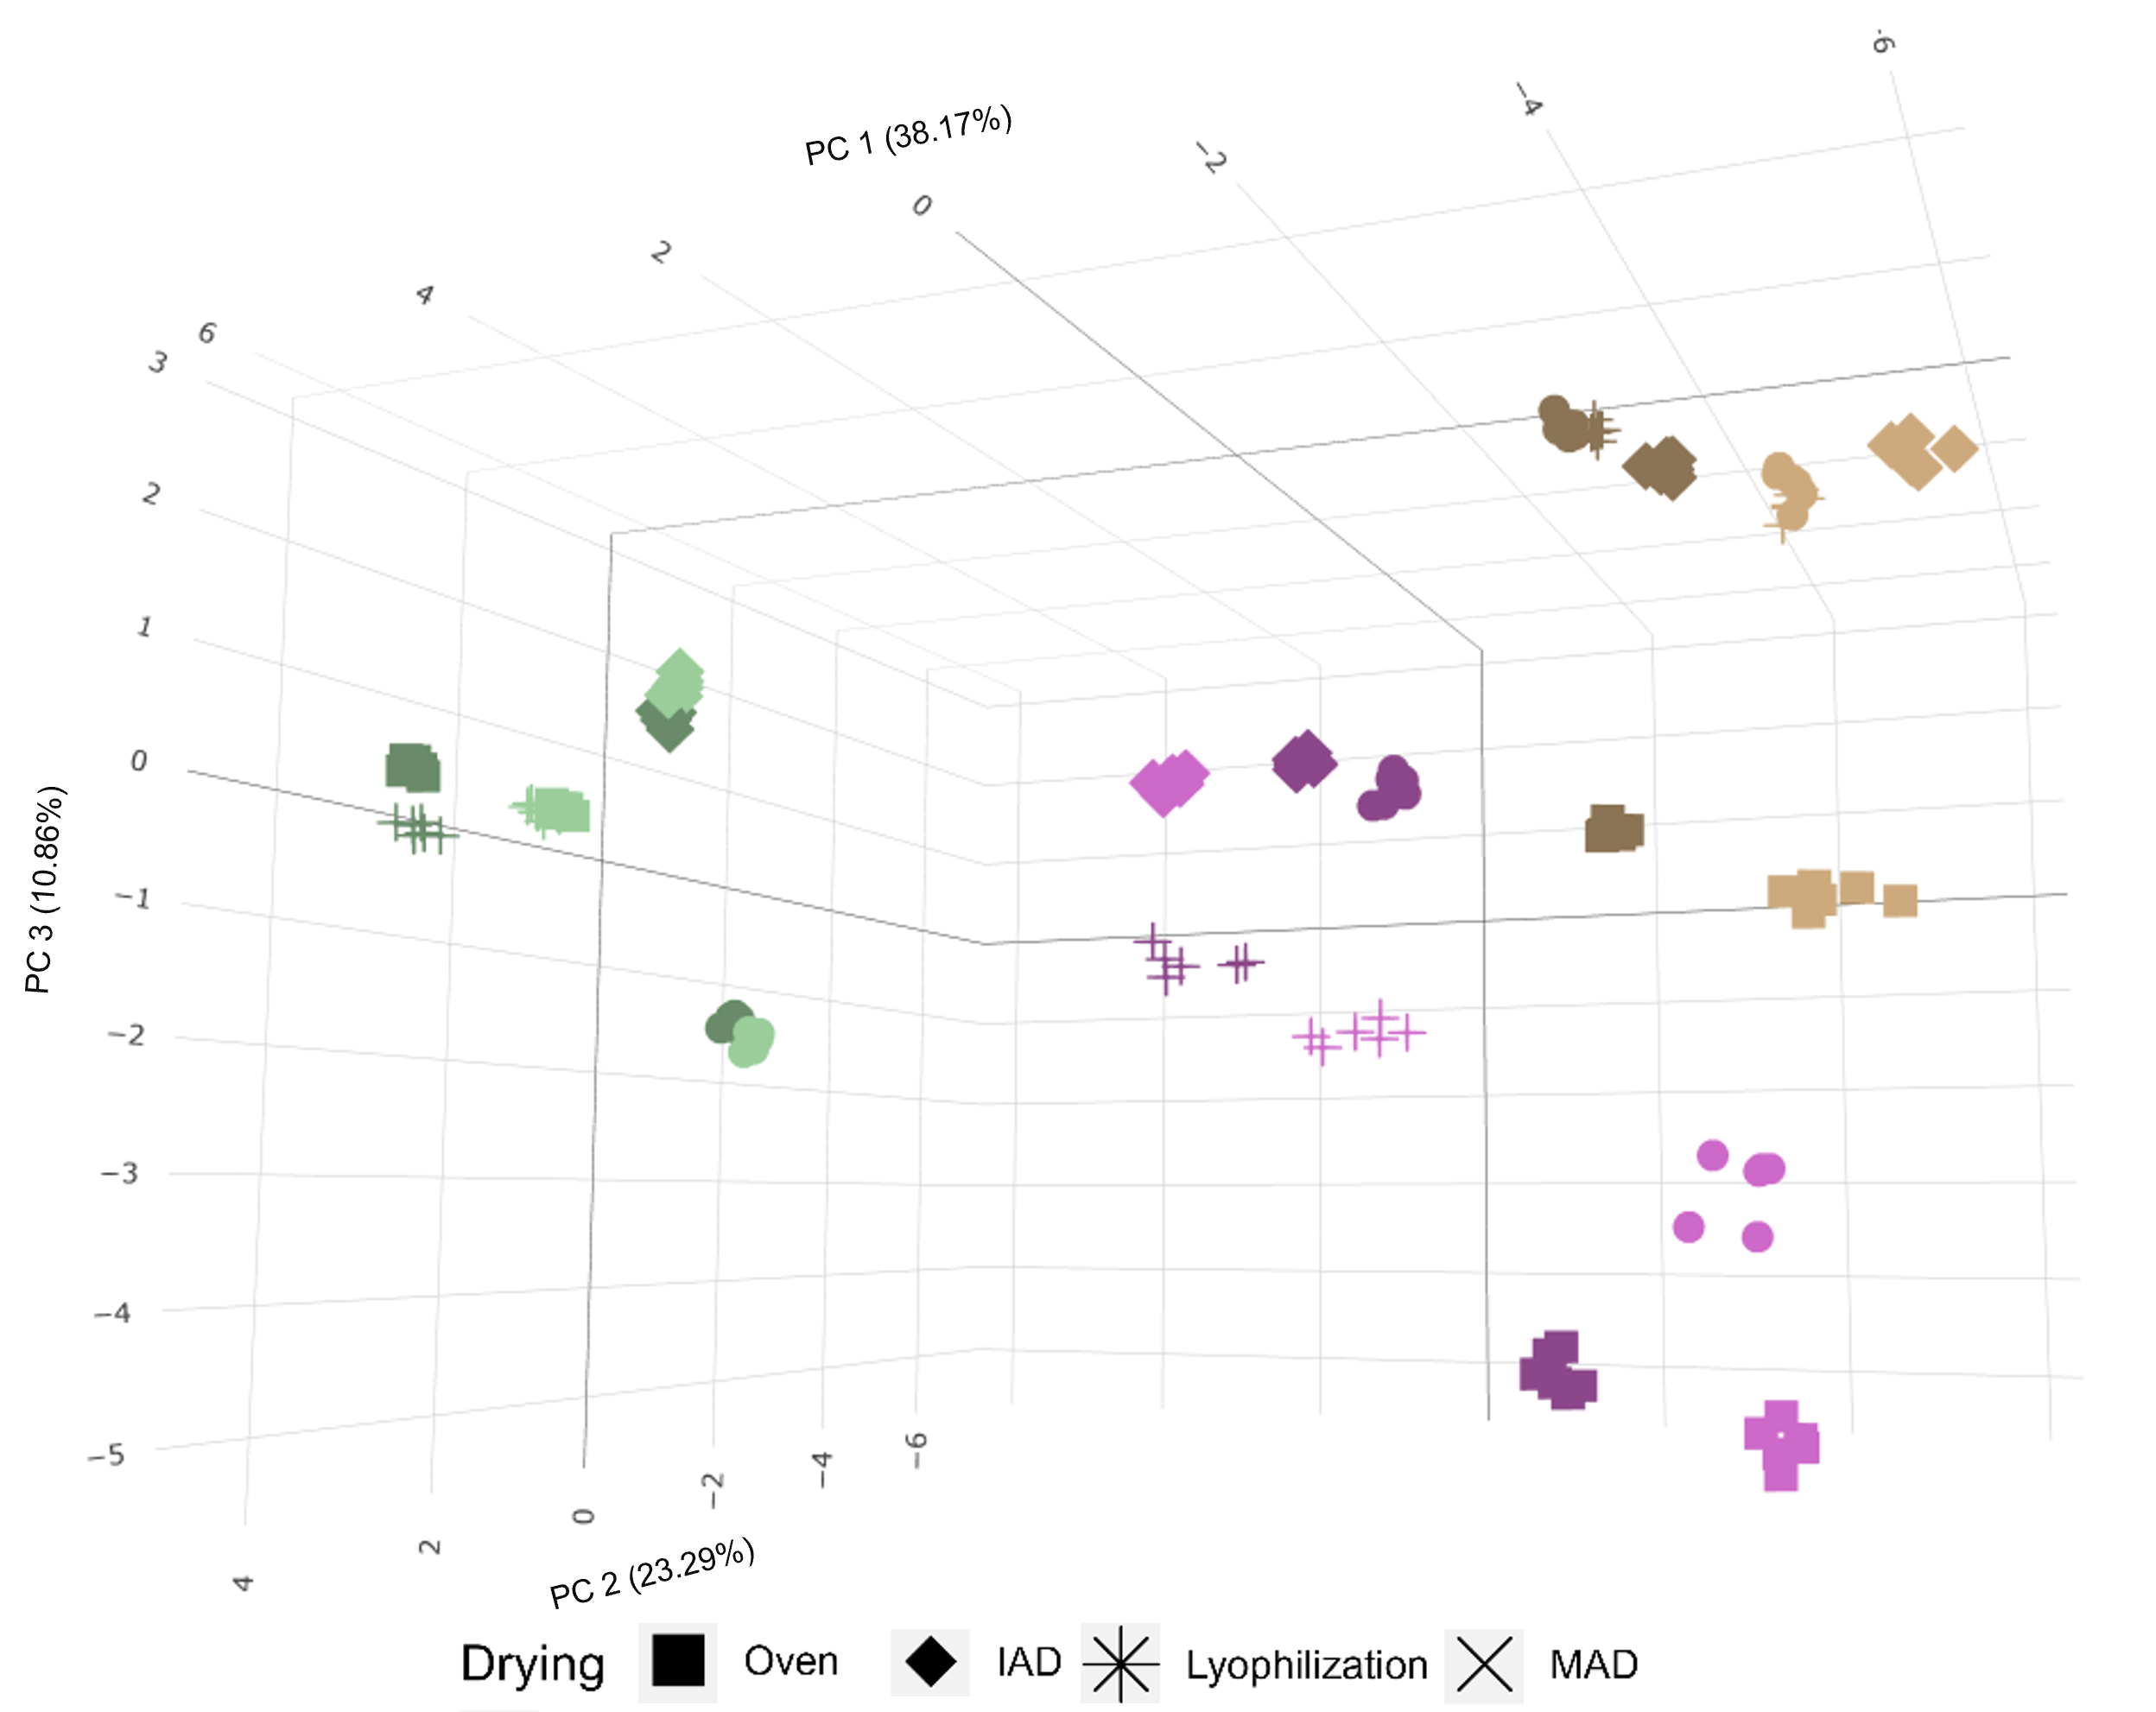

Supplement: Supplementary file 1 [file supplementary › Figure S1.tif]

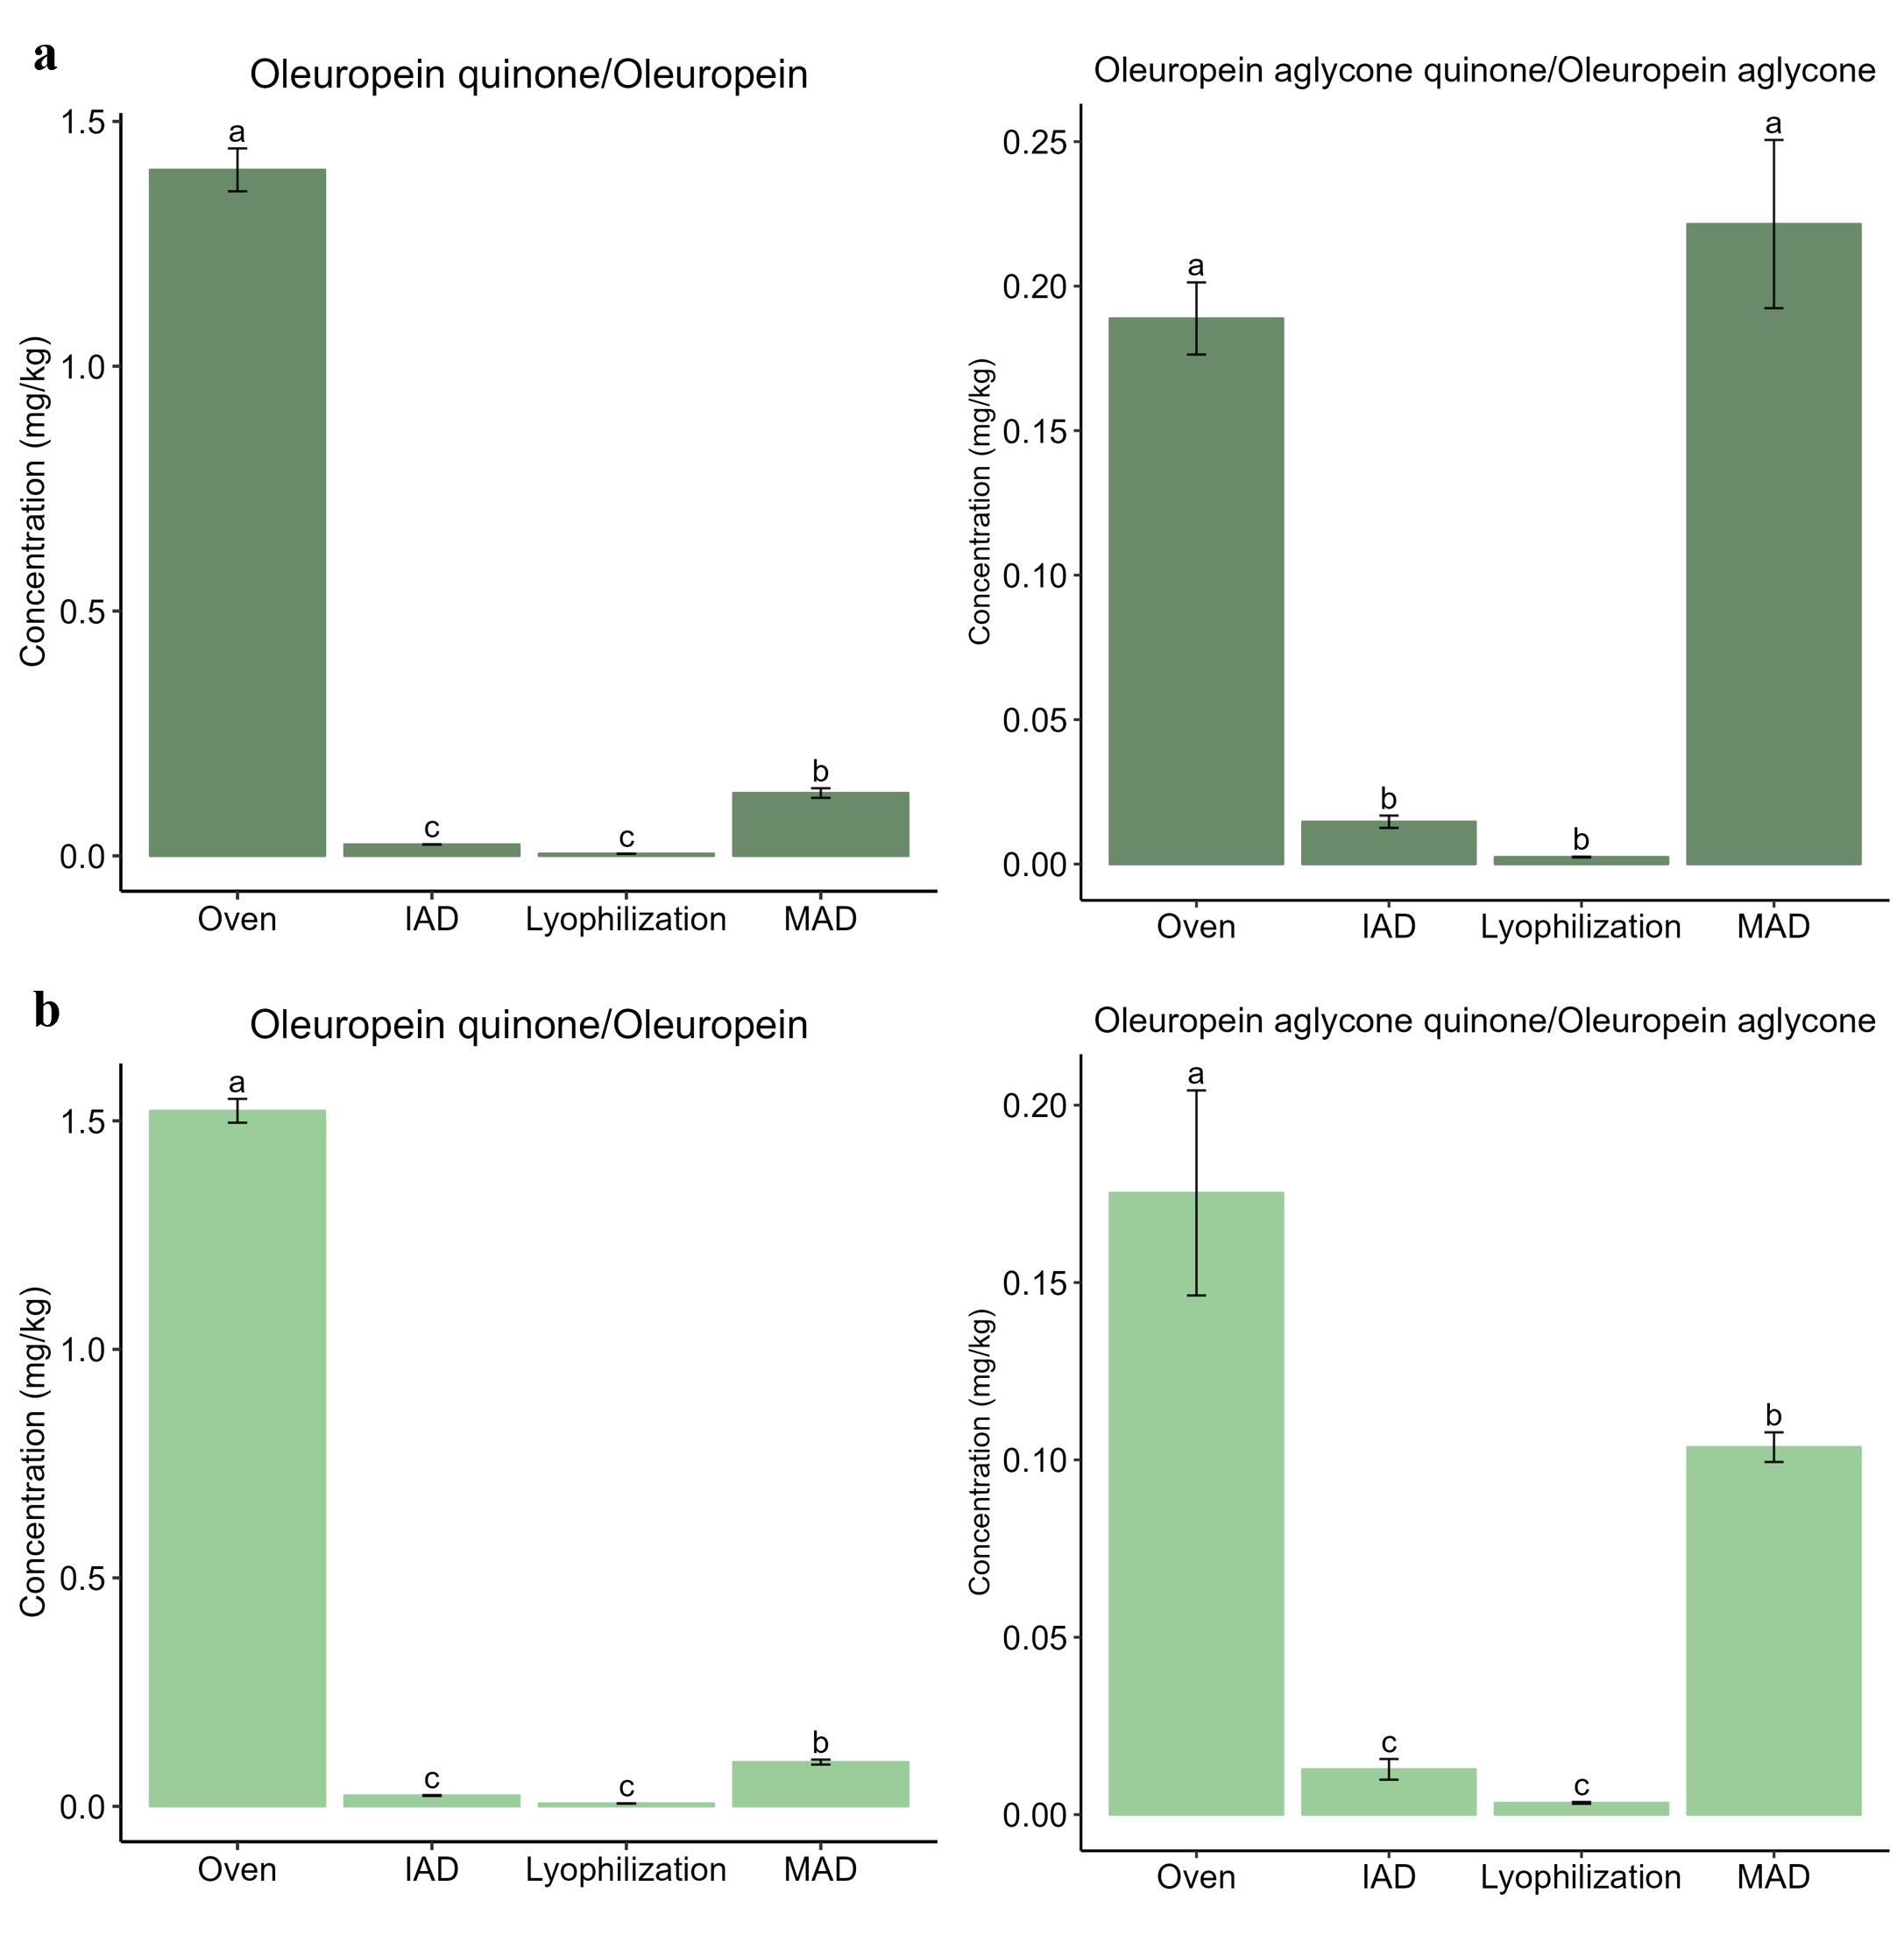

Supplement: Supplementary file 1 [file supplementary › Figure S2.tif]

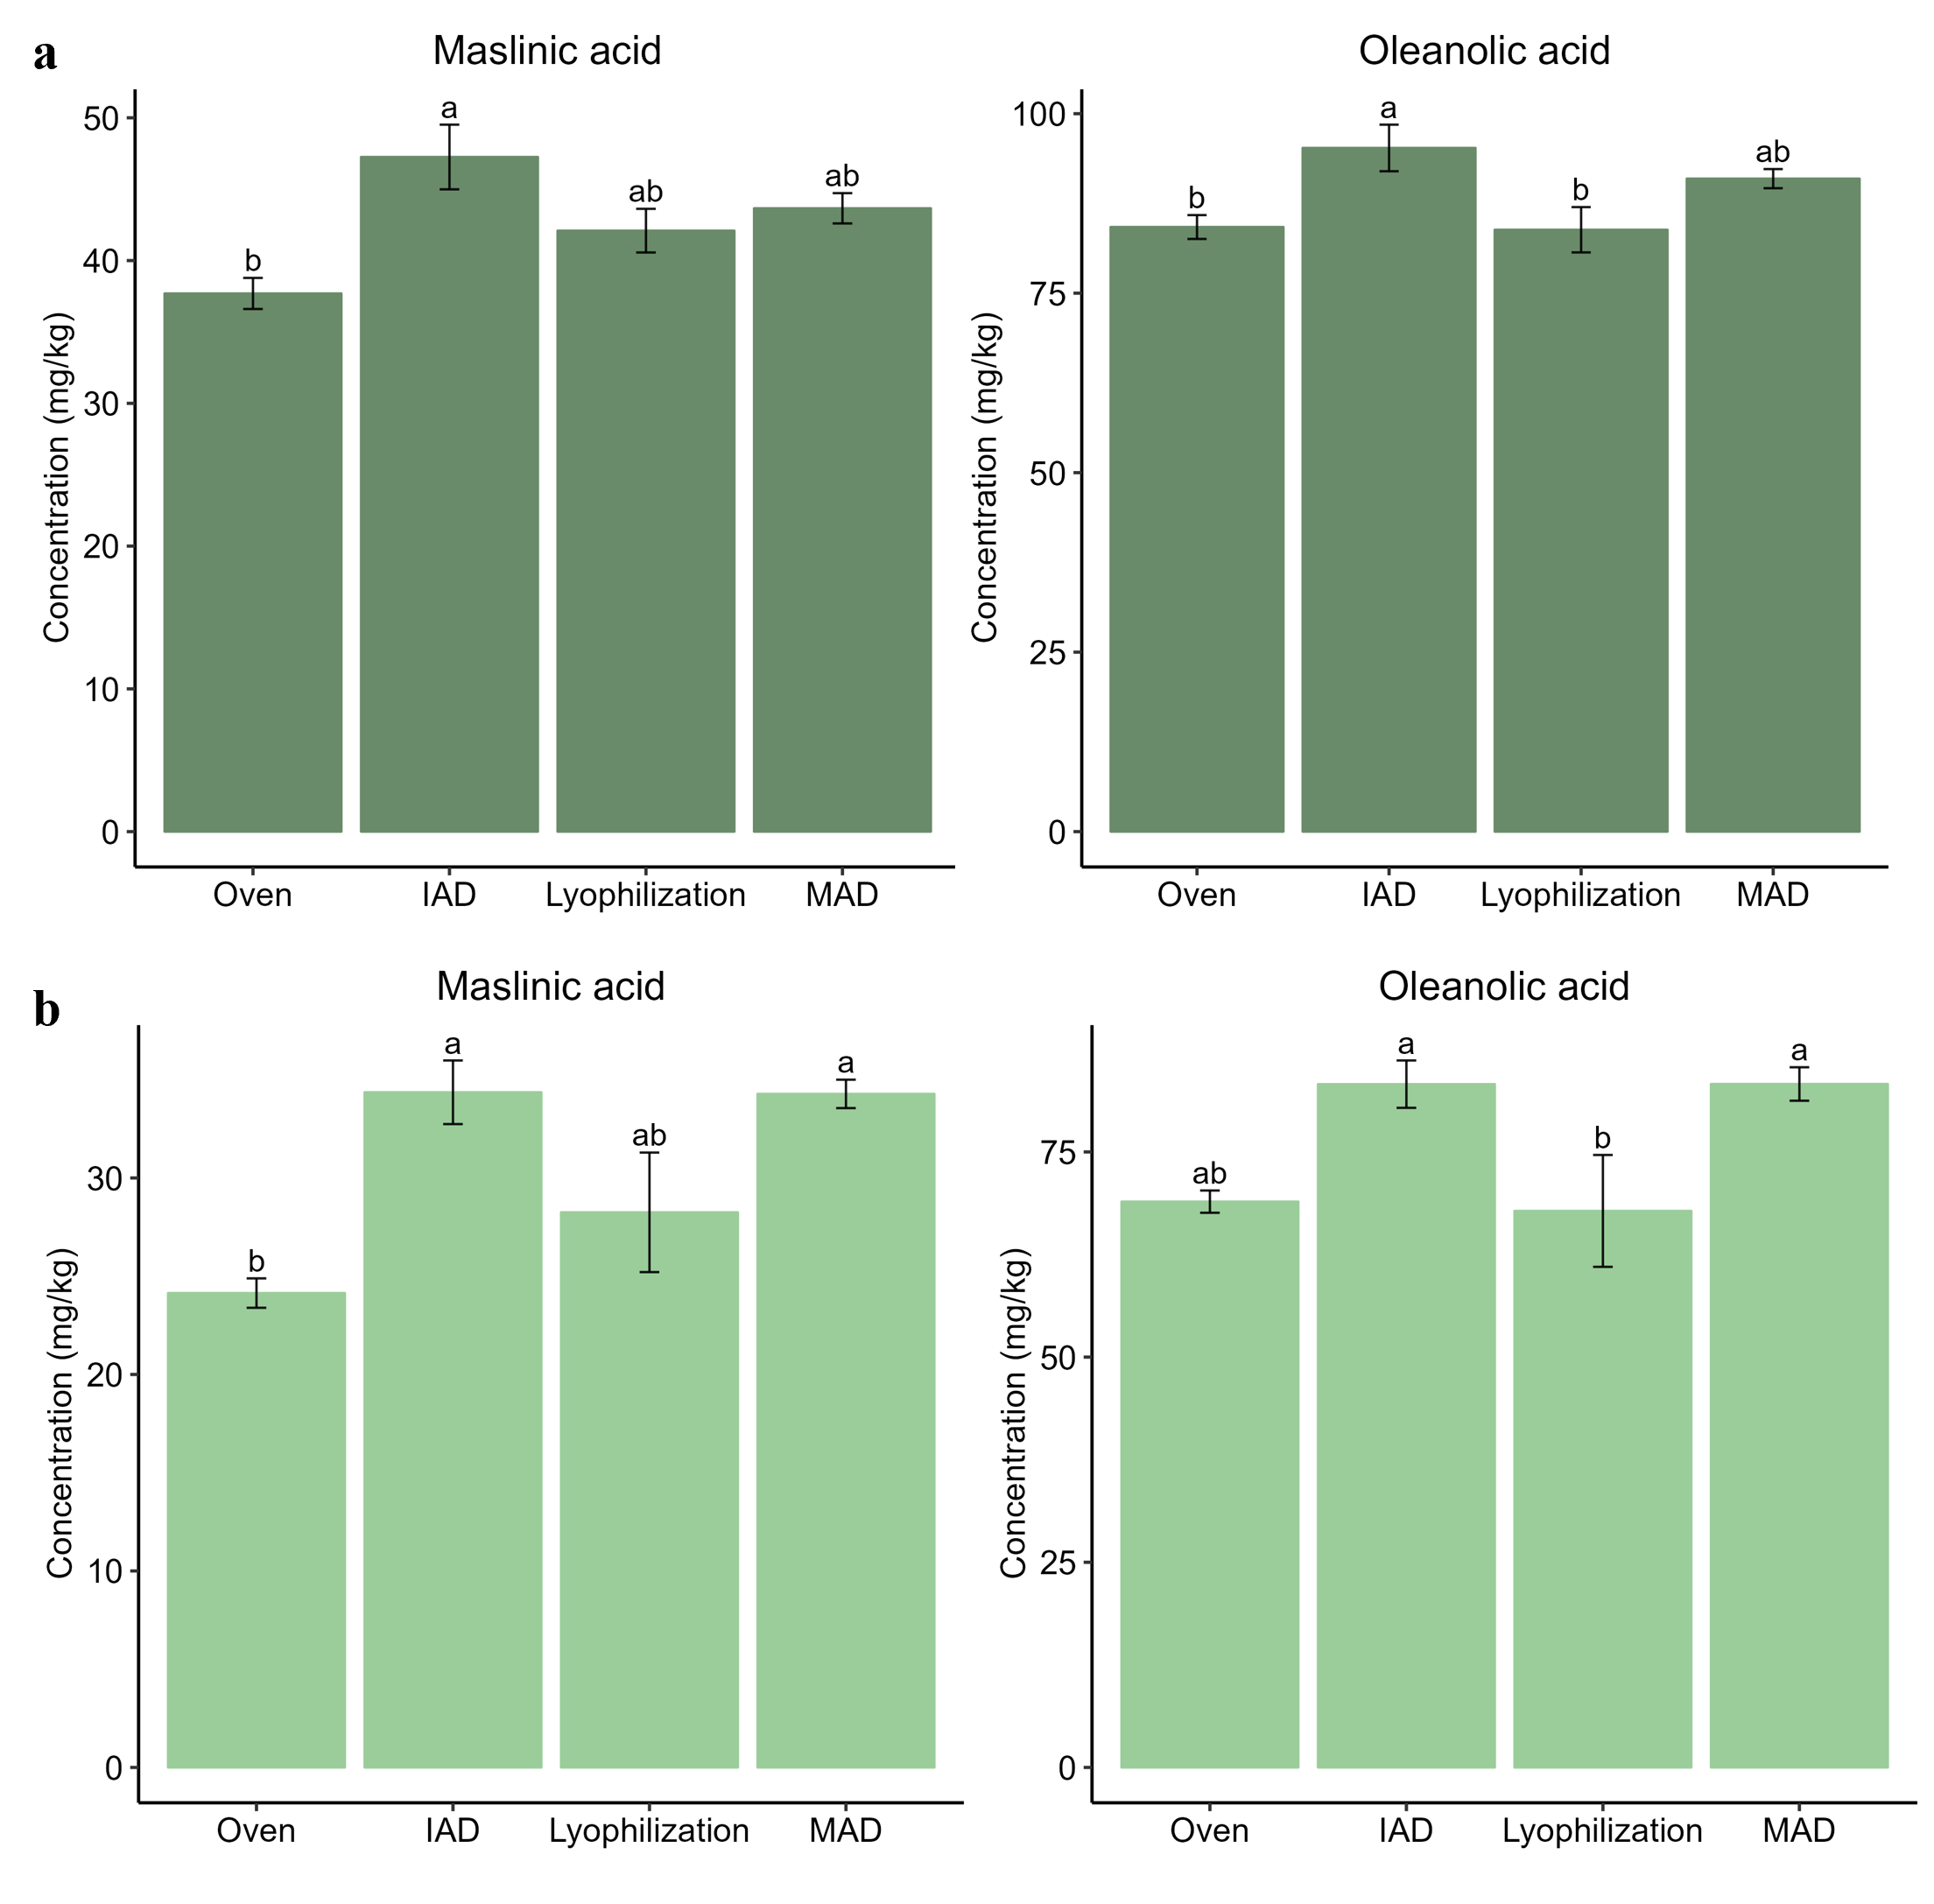

Supplement: Supplementary file 1 [file supplementary › Figure S3.tif]

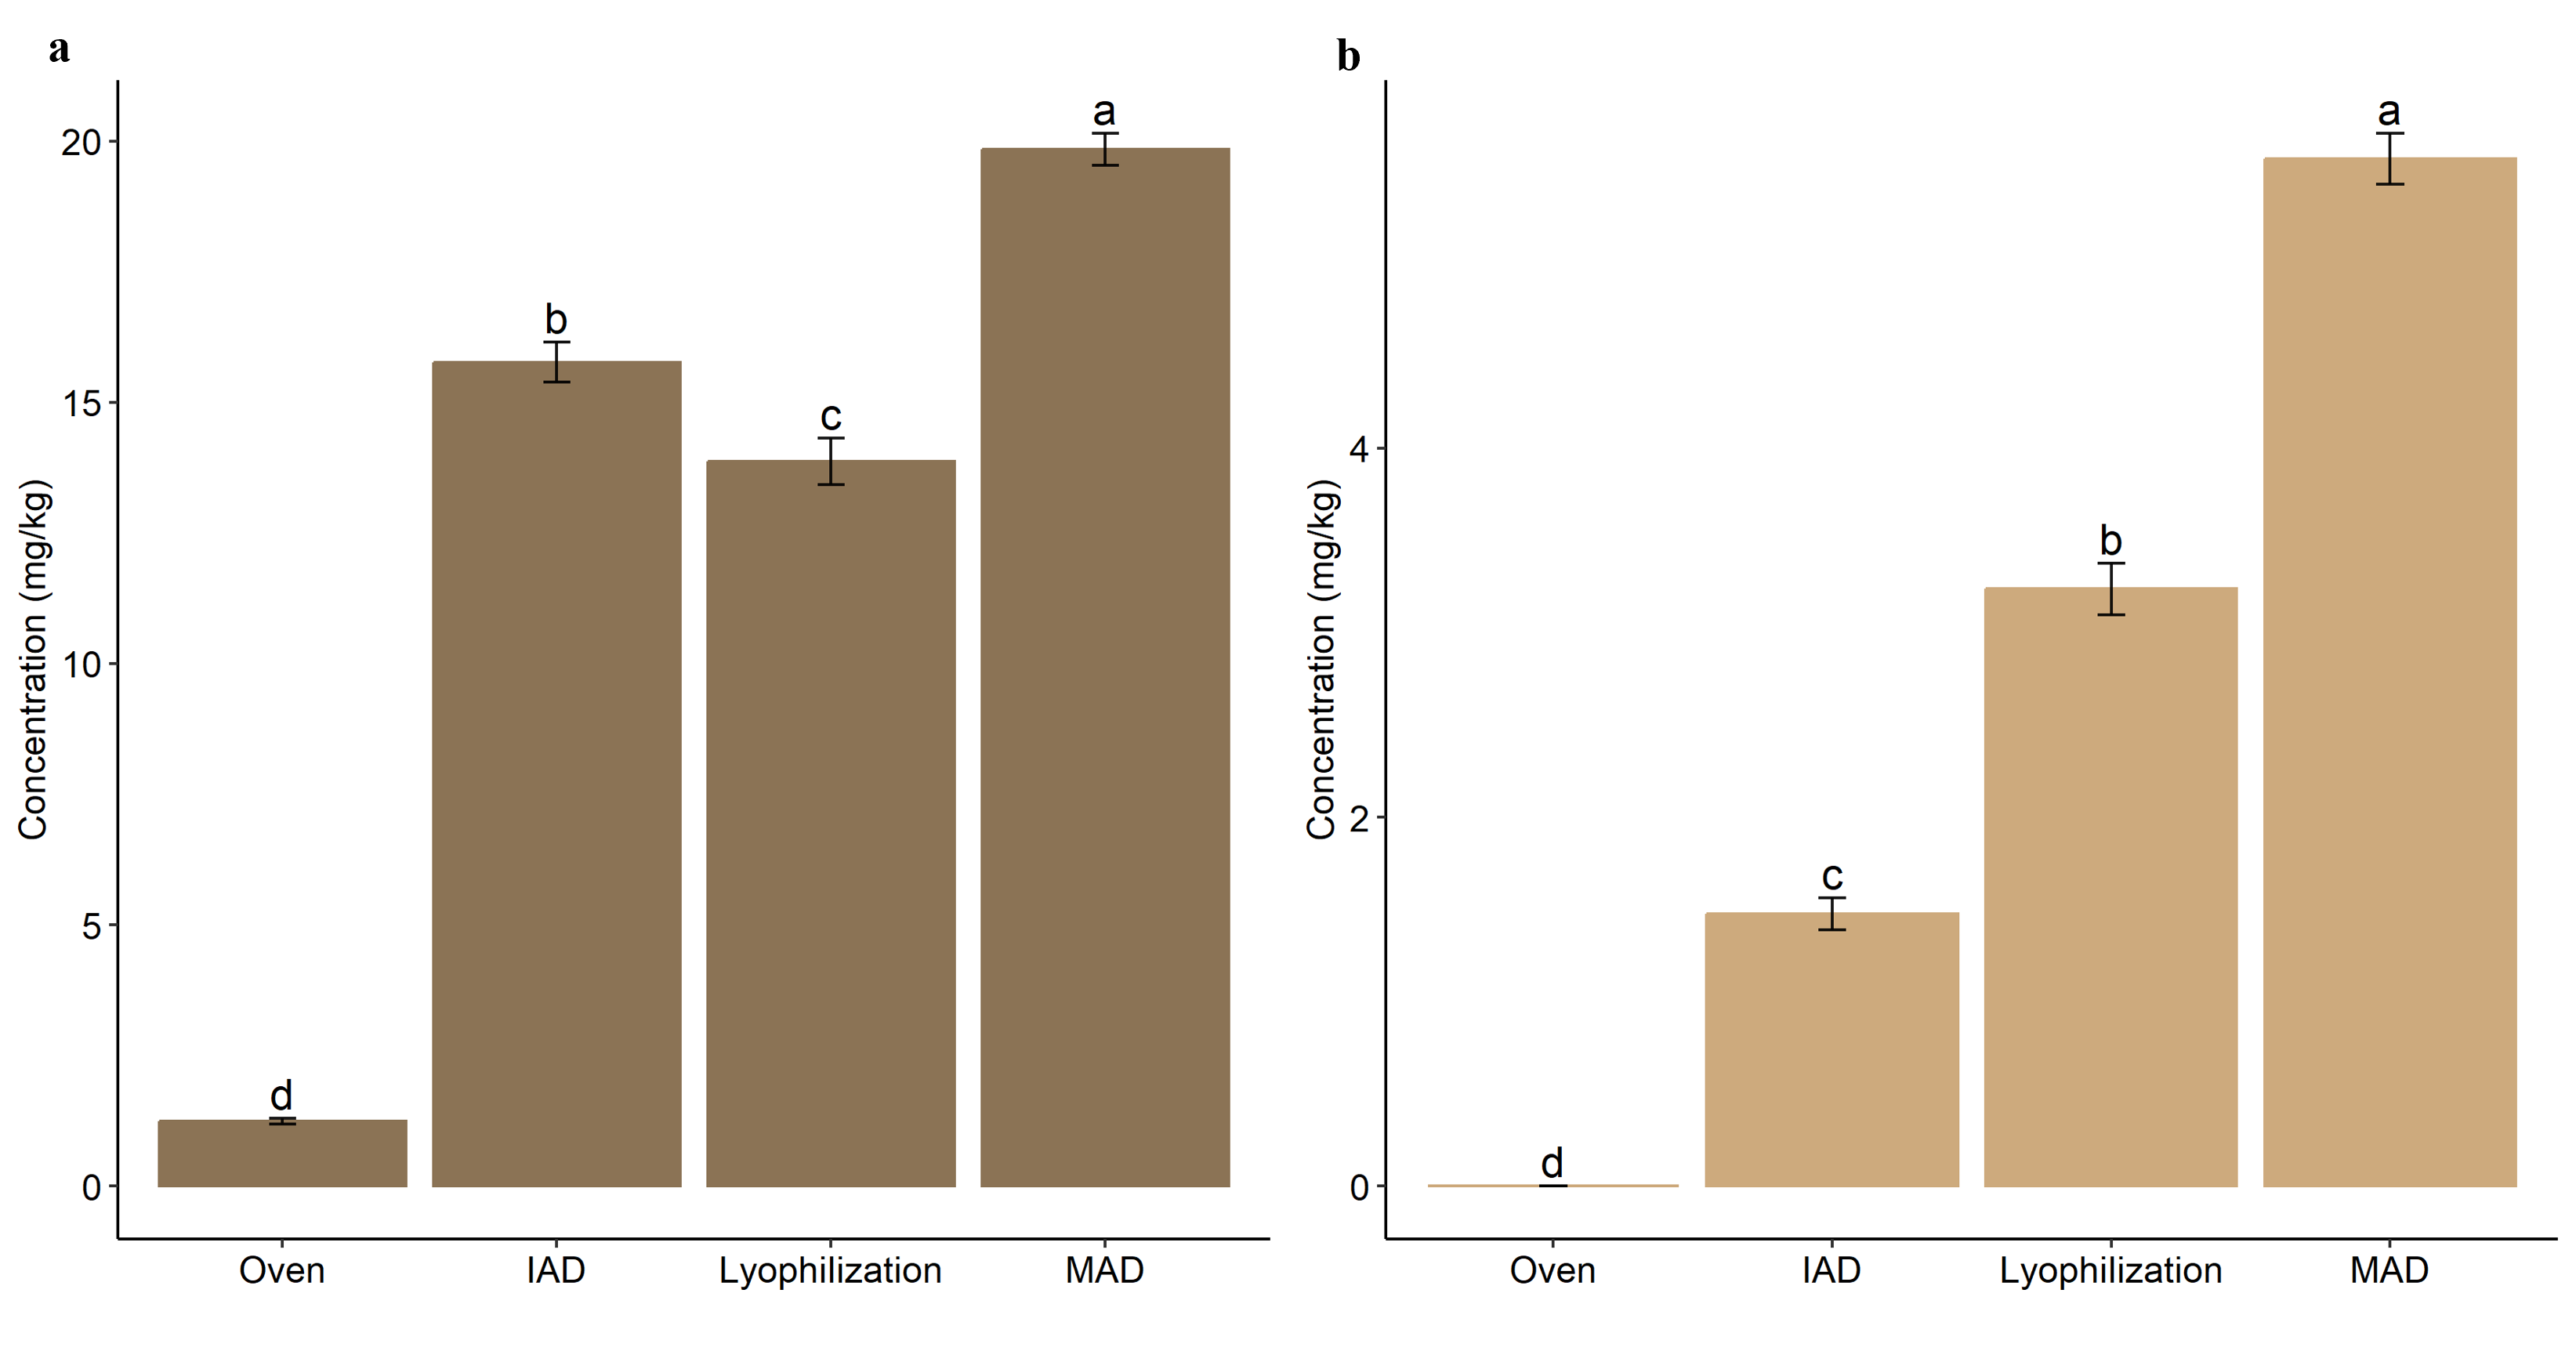

Supplement: Supplementary file 1 [file supplementary › Figure S4.tif]

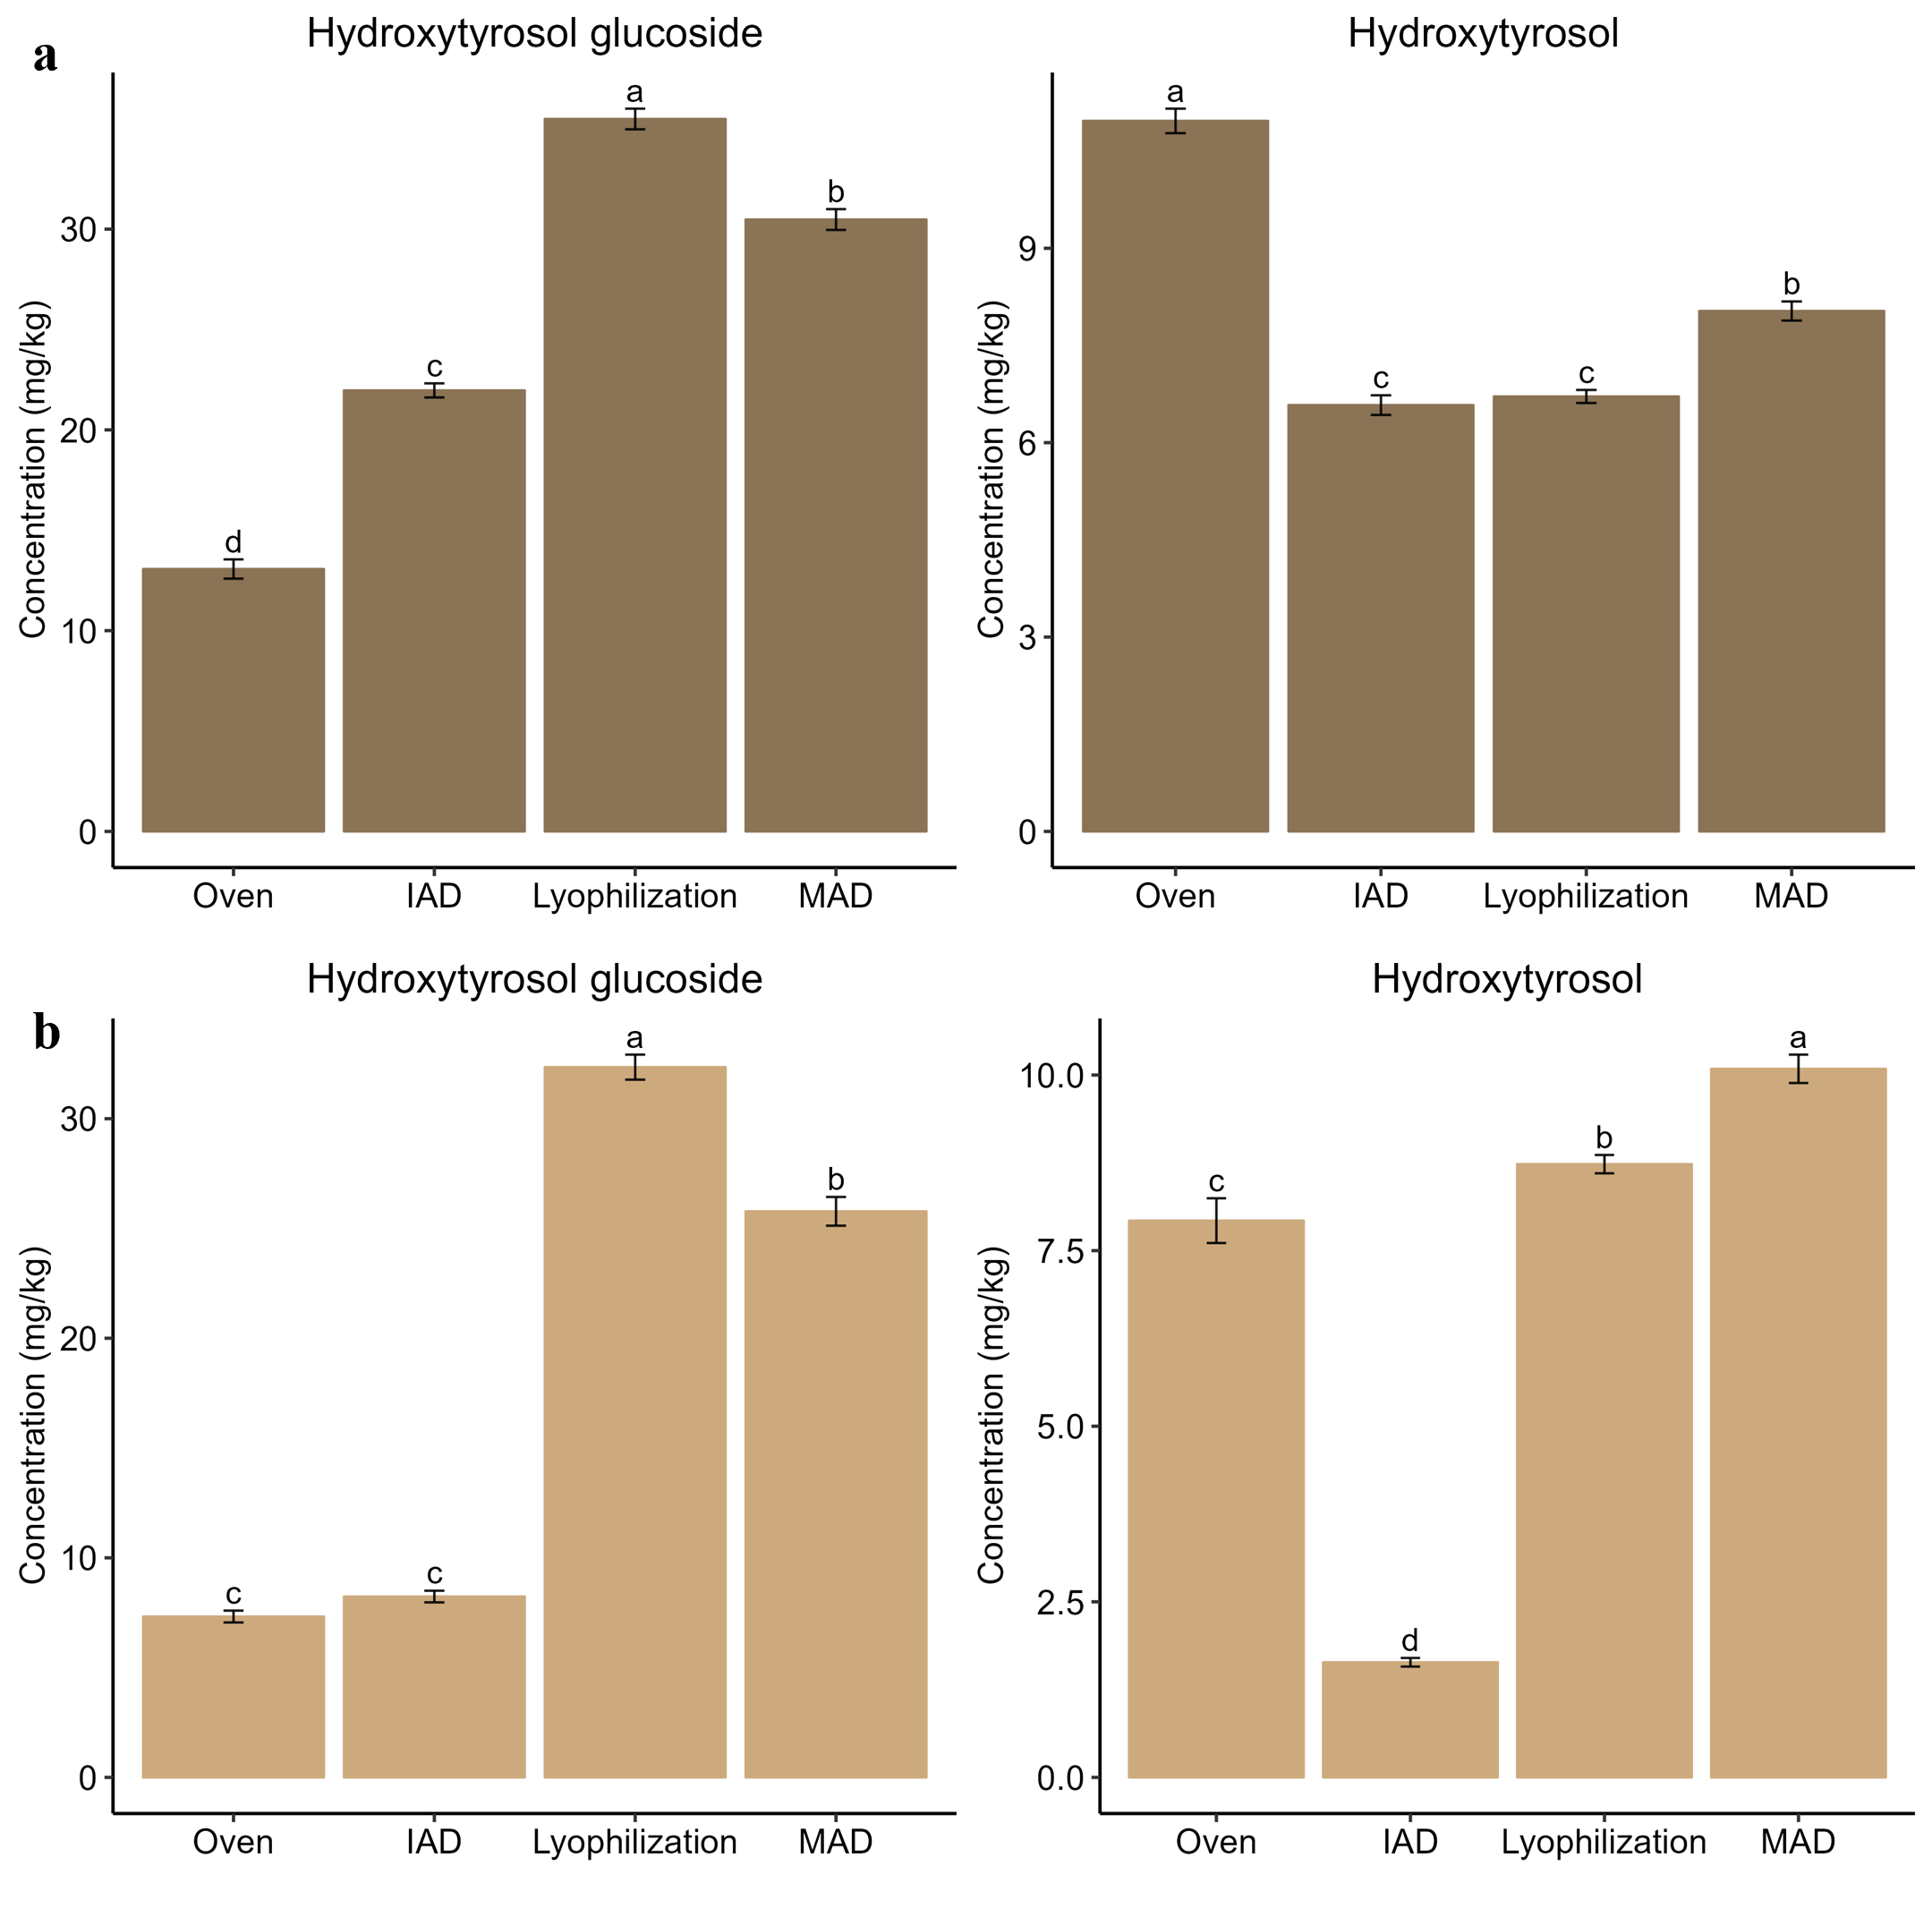

Supplement: Supplementary file 1 [file supplementary › Figure S5.tif]

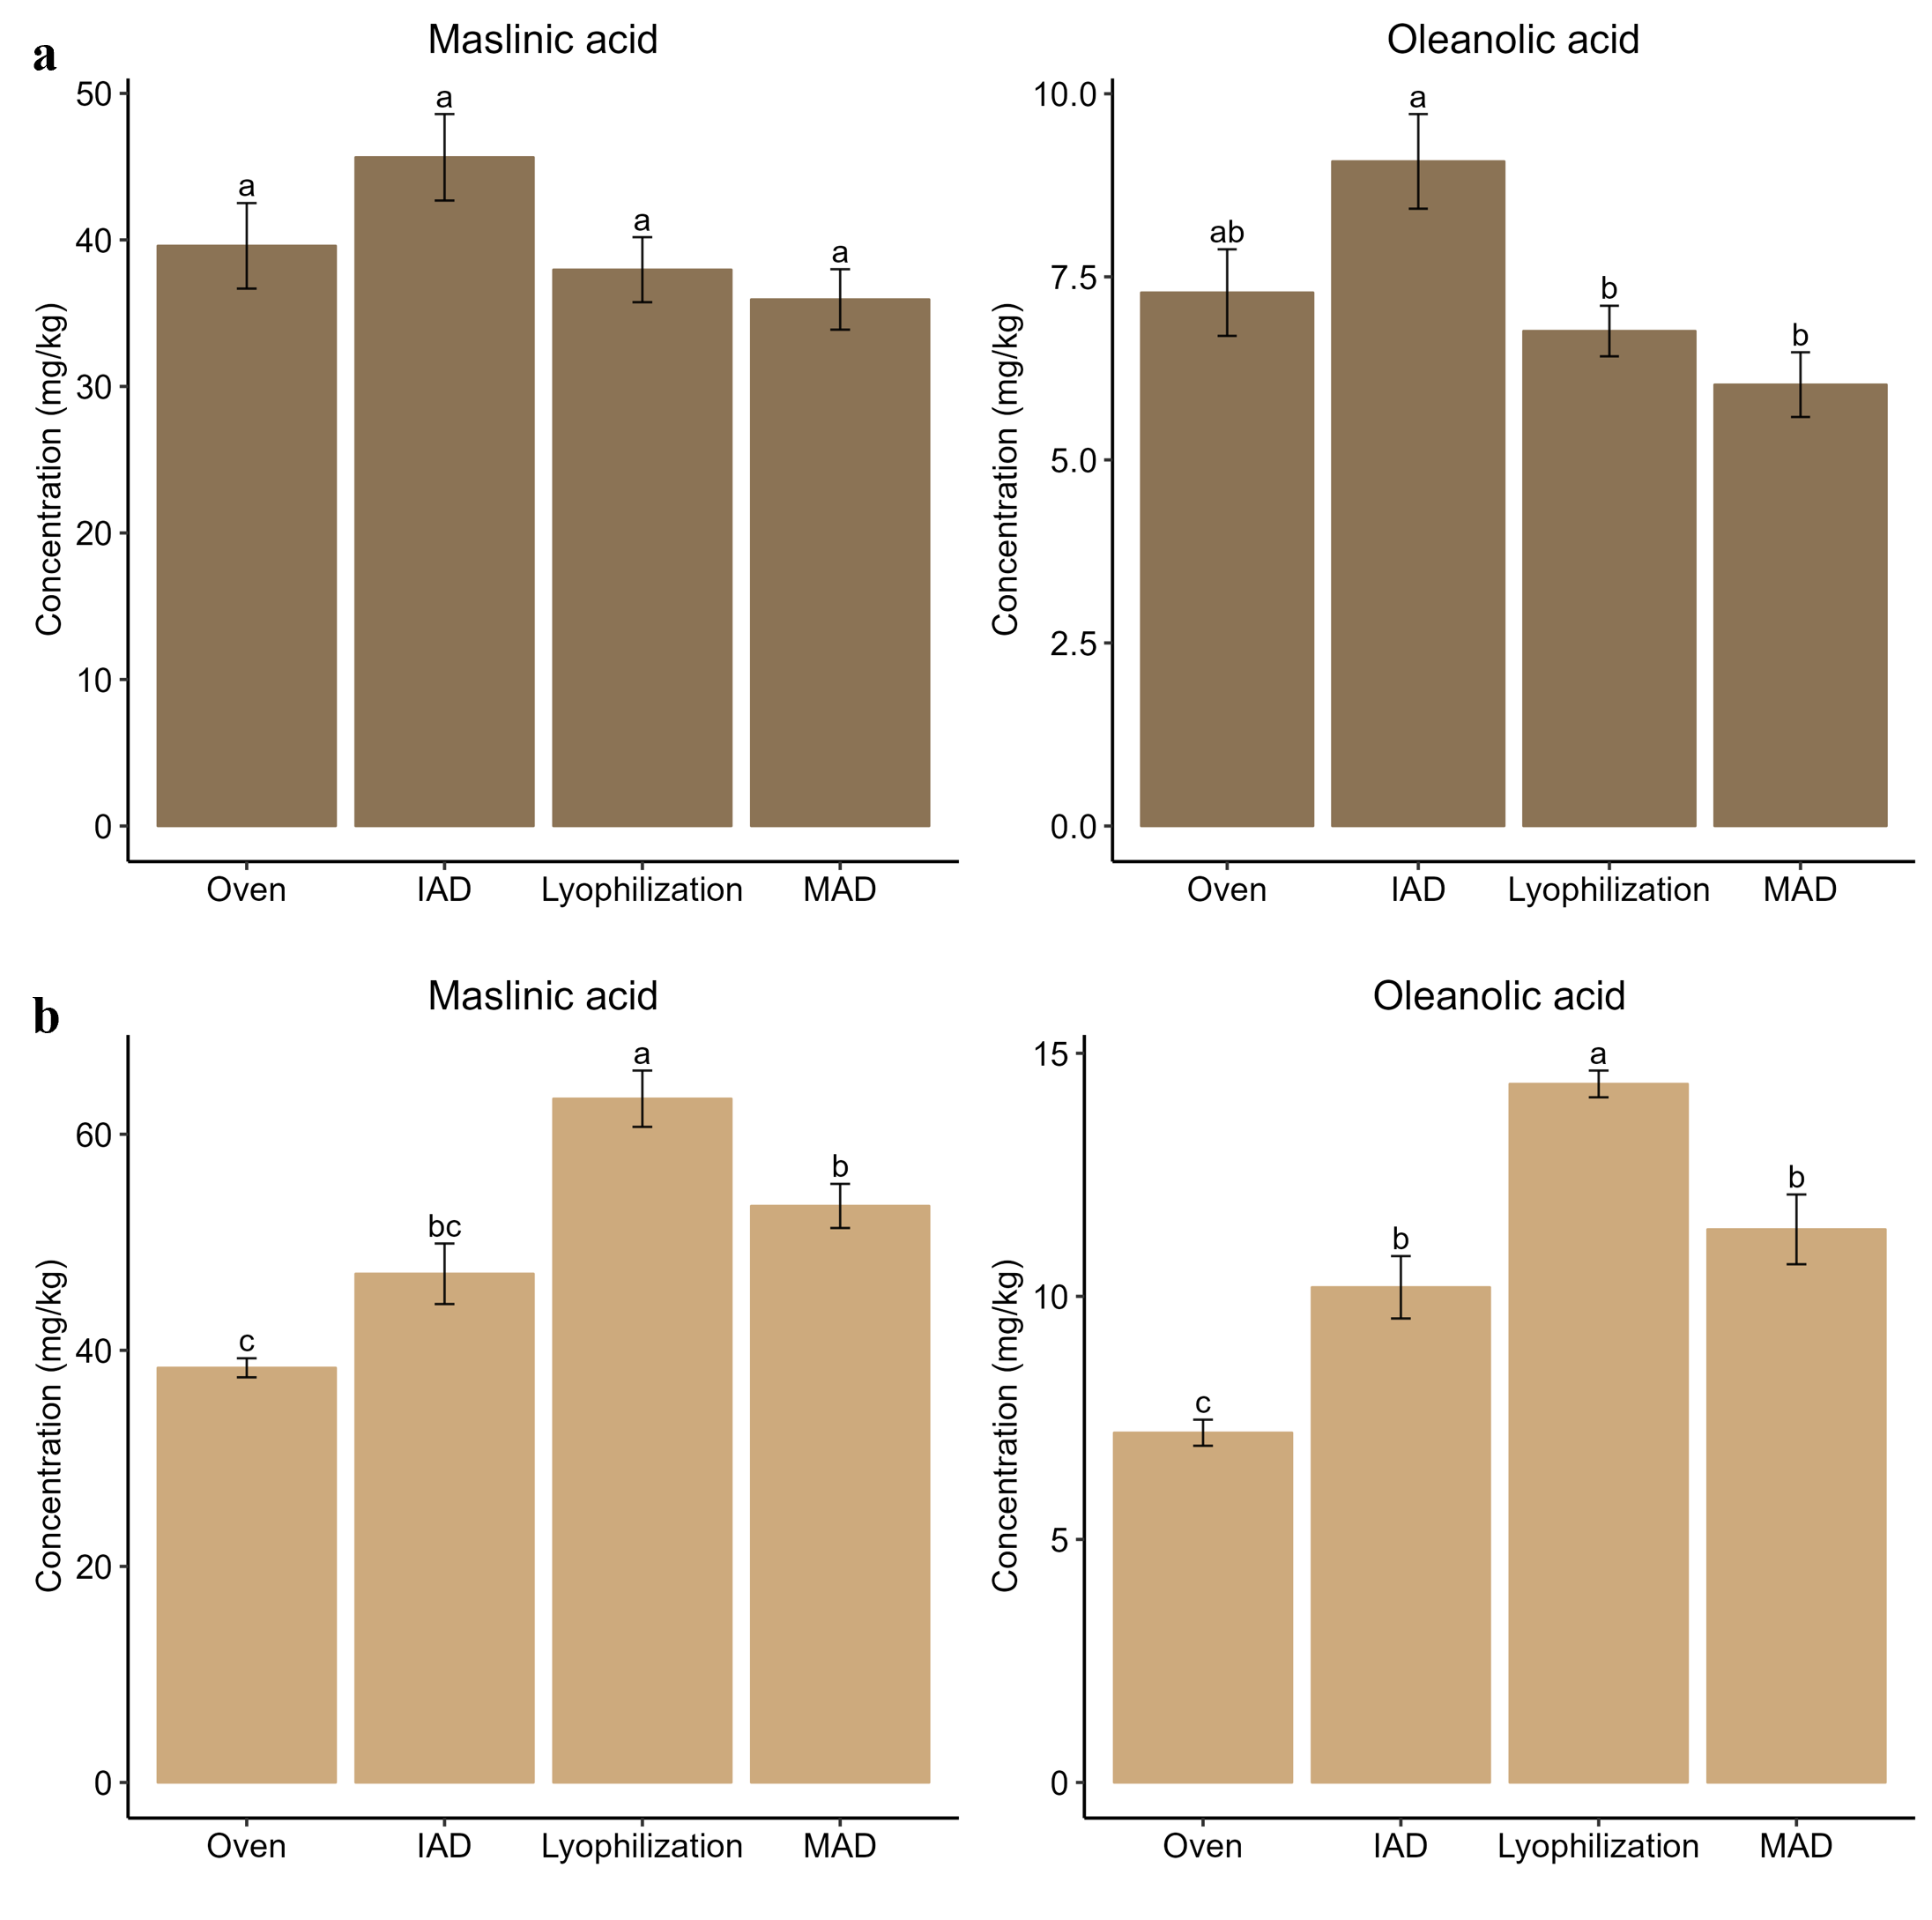

Supplement: Supplementary file 1 [file supplementary › Figure S6.tif]

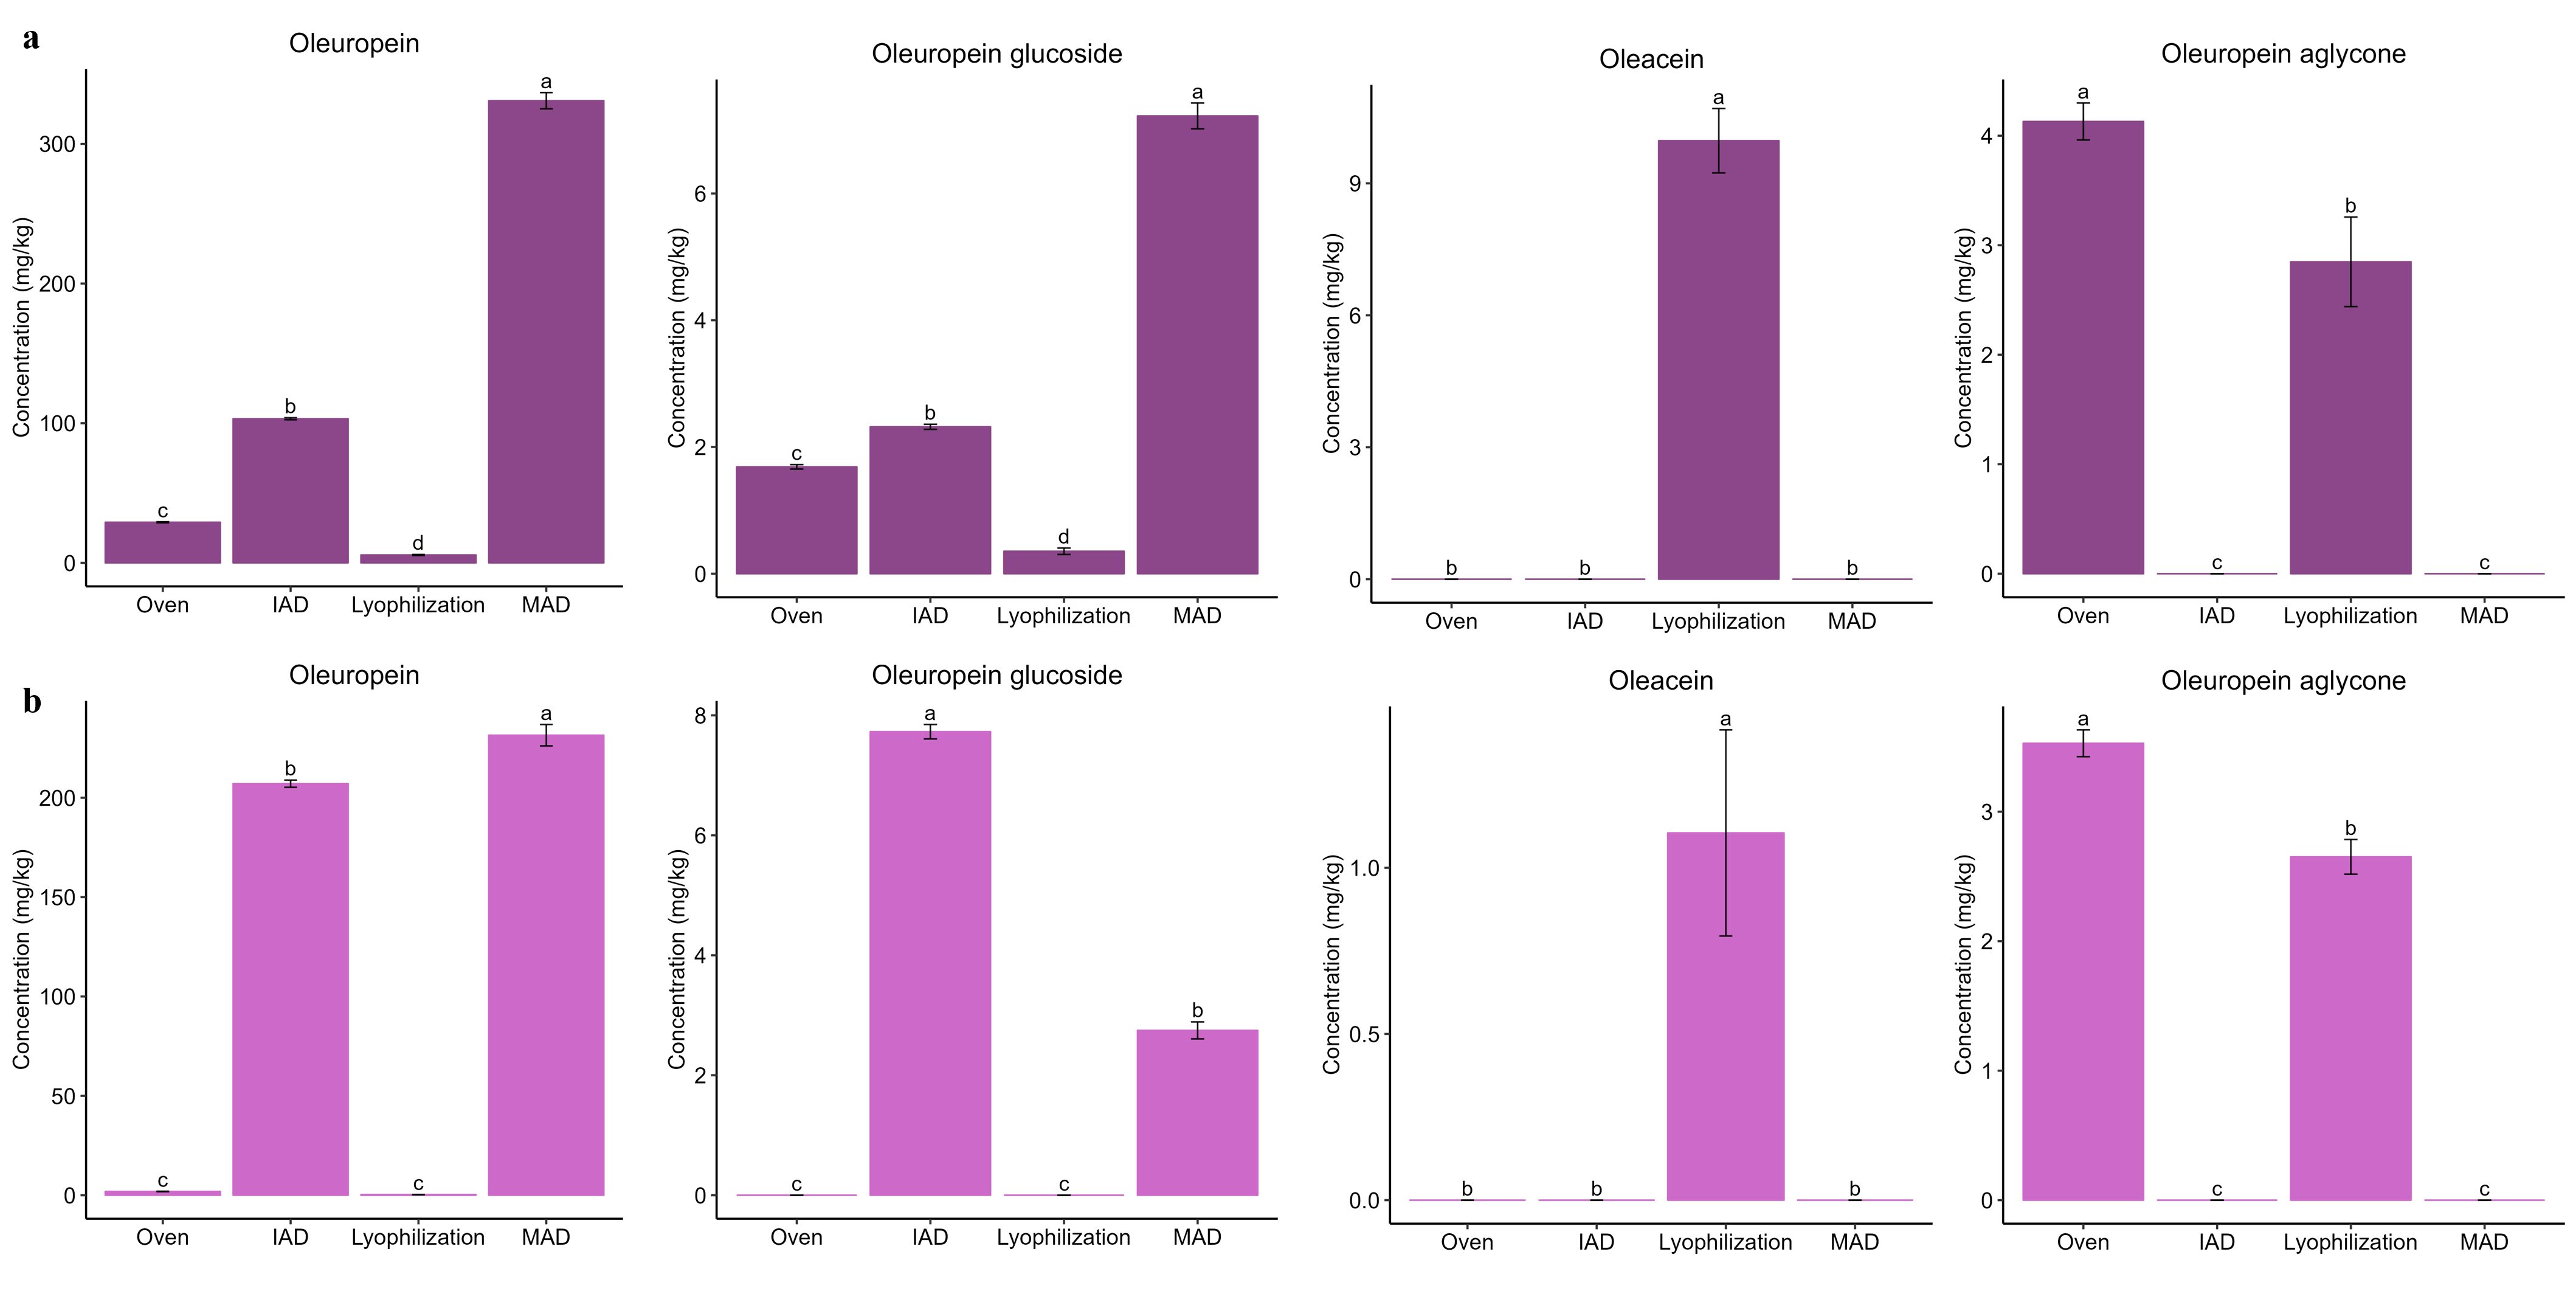

Supplement: Supplementary file 1 [file supplementary › Figure S7.tif]

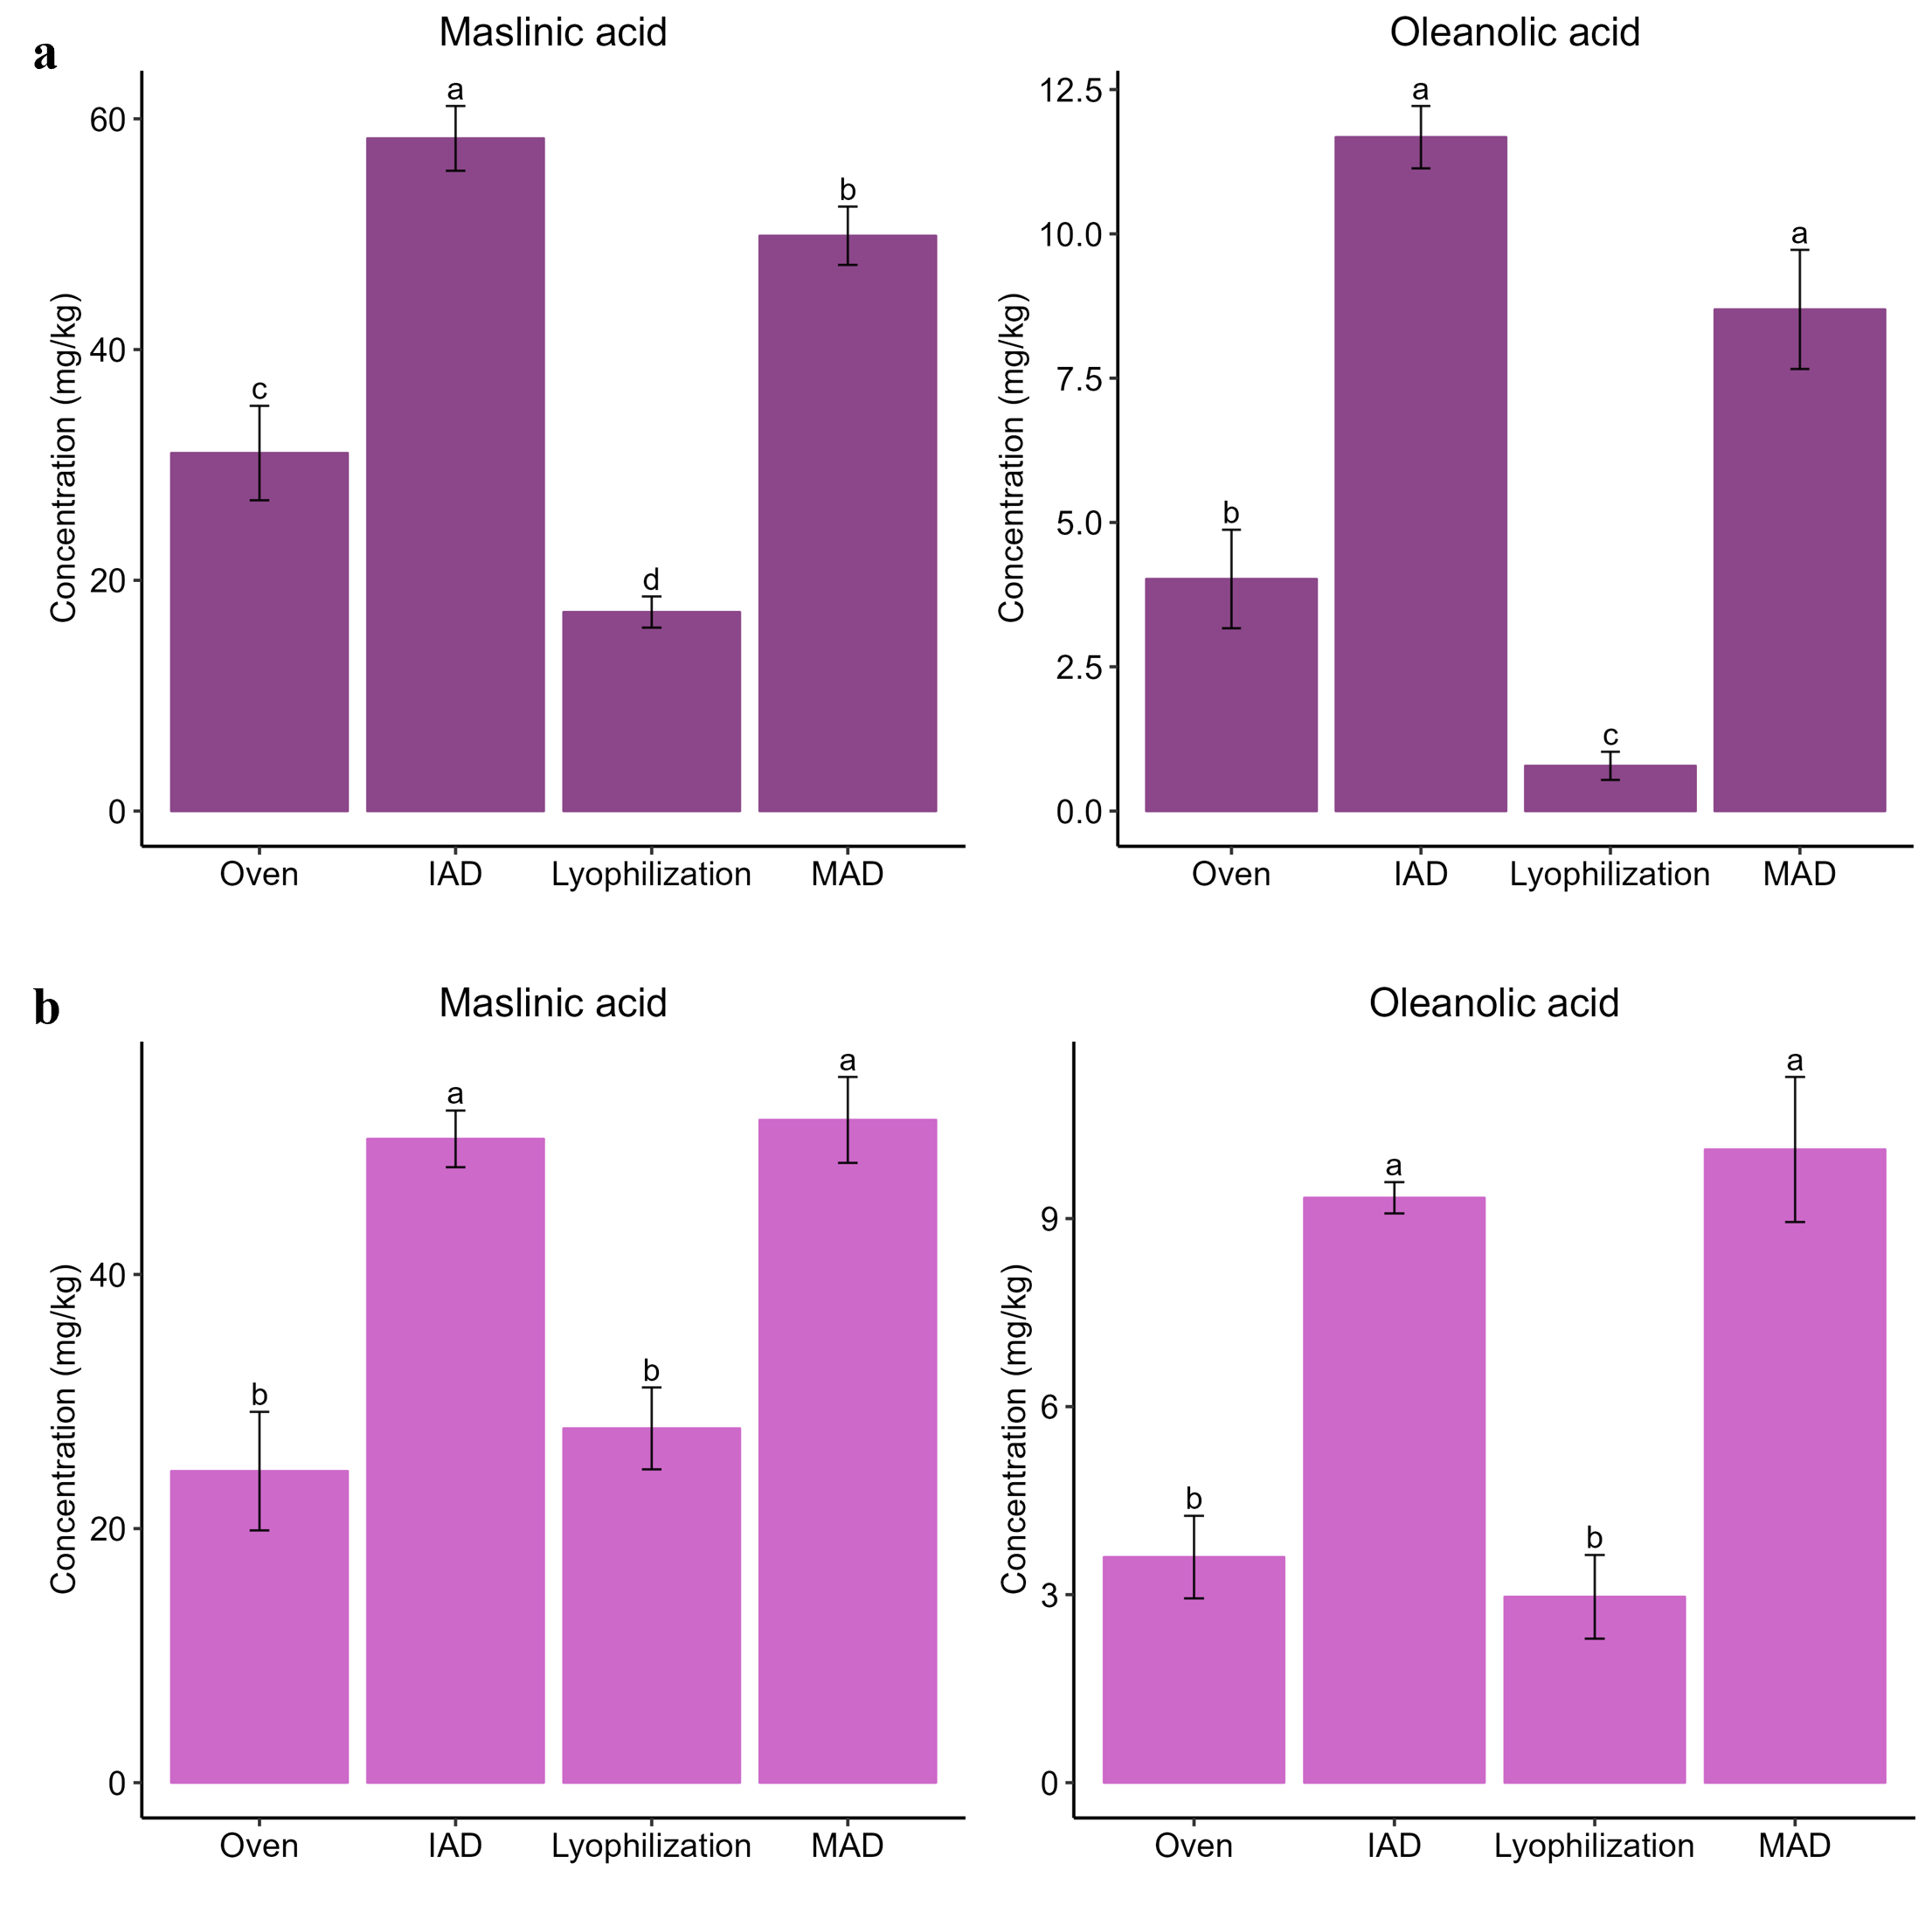

Supplement: Supplementary file 1 [file supplementary › Figure S8.tif]
